1 **Title:** Recombinant production of rabbit  $\beta$ -Nerve Growth Factor and its biological effect on rabbit  
2 sperm.

3

4 **Short title:** Production of recombinant rabbit  $\beta$ -NGF and its effects in rabbit sperm.

5

6 **Keywords:** Beta Nerve Growth Factor; recombinant protein; CHO cells; PC12 cells; amino acid  
7 sequence; rabbit sperm

8

9 **Authors:** Ana Sanchez-Rodriguez<sup>1\*</sup>, Paloma Abad<sup>2</sup>, Maria Arias-Alvarez<sup>3</sup>, Pilar G. Rebollar<sup>4</sup>, José M.  
10 Bautista<sup>2</sup>, Pedro L. Lorenzo<sup>1</sup>, Rosa M. Garcia-Garcia<sup>1\*</sup>

11

## 12 **Affiliations**

13 <sup>1</sup>Department of Physiology, Faculty of Veterinary Sciences, Complutense University of Madrid,  
14 Madrid, Spain.

15 <sup>2</sup>Department of Biochemistry and Molecular Biology, Faculty of Veterinary Sciences, Complutense  
16 University of Madrid, Madrid, Spain

17 <sup>3</sup>Department of Animal Production, Faculty of Veterinary Sciences, Complutense University of  
18 Madrid, Madrid, Spain.

19 <sup>4</sup>Department of Agrarian Production, ETSIAAB, Polytechnic University of Madrid, Madrid, Spain.

20

21 **\*Corresponding authors:**

22 E-mail: [anasanro.vet@gmail.com](mailto:anasanro.vet@gmail.com) (ASR), [rosa.garcia@vet.ucm.es](mailto:rosa.garcia@vet.ucm.es) (RMGG)

## 24 Abstract

25 The neurotrophin  $\beta$ -Nerve Growth Factor ( $\beta$ -NGF) is flourishing as a protein with important roles in  
26 the ovulation induction process in induced-ovulation species but data in rabbits are still inconclusive,  
27 probably due to the species-specificity effect of the neurotrophin to trigger the ovulation. Moreover,  $\beta$ -  
28 NGF seems to have a role in sperm function. To clarify these functionalities we aimed, in the present  
29 research: 1) to newly synthesize a functional recombinant  $\beta$ -NGF from rabbit (rr $\beta$ -NGF), 2) to reveal  
30 differences in the amino acid sequence of rabbit  $\beta$ -NGF compared to other sequences of induced and  
31 spontaneous ovulator species, and 3) to assess the effects of rr $\beta$ -NGF on sperm viability and motility.  
32 The nucleotide sequence of *NGF* from rabbit prostate was sequenced by Rapid Amplification of  
33 cDNA Ends (RACE) and annotated in GenBank (KX528686). Then, rr $\beta$ -NGF was produced in CHO  
34 cells and purified by affinity chromatography. Western blot and MALDI-TOF analyses confirmed the  
35 correct identity of the recombinant protein. rr $\beta$ -NGF functionality was validated in PC12 cells through  
36 a successful dose-response effect along 8 days. The comparison of the amino acid sequences of NGF  
37 between rabbit and other species suggested some relevant substitutions at its binding site to both the  
38 high- (TrkA) and the low- (p75) affinity receptors. The addition of rr $\beta$ -NGF in rabbit sperm, in a time-  
39 and dose-response study, did not affect its viability but slightly changed some of its motility  
40 parameters at the highest concentration used (100 ng/ml). Thus, it can be considered that this new  
41 recombinant protein may be used for biotechnological and reproduction assisted techniques in  
42 ovulation-induced species.

43

## 44 Introduction

45 Beta Nerve Growth Factor ( $\beta$ -NGF) is a neurotrophin first described for its function in survival and  
46 maintenance of sympathetic and sensory neurons in the nervous system [1]. Similar to many other  
47 growth factors,  $\beta$ -NGF is synthesized as a precursor (pro-NGF), which is a 241-residue protein  
48 composed by a signal peptide of 18 residues, a pro-peptide of 103 residues and the mature form of 120  
49 residues in the C-terminal end (data extrapolated and generalized from human  $\beta$ -NGF:

50 <http://www.uniprot.org/uniprot/P01138>). N-glycosylation of pro-NGF is essential for the processing,  
51 secretion and construction of the tertiary fold of the homodimer of  $\beta$ -NGF [2, 3]. Then, the protein  
52 should form a dimer whose correct folding is crucial for the performance of the biological activity [4].  
53 Furthermore, the post-translational modifications of the molecule, i.e. three disulfide bonds and the  
54 cysteine knot within the two  $\beta$ -NGF chains, are essential for the correct structure [5]. Since only  
55 intracellular engineering of mammalian cells is able to efficiently generate all these modifications,  
56 Chinese Hamster Ovary (CHO) cells have been used elsewhere for the recombinant production of  
57 human and mouse  $\beta$ -NGF [3, 6], resulting in biologically active proteins.  
58  $\beta$ -NGF achieves its function when it binds to its high-affinity receptor, TrkA, present in a wide range  
59 of cells, such as neurons [7], keratinocytes [8], cardiac myocytes [9] or cells of sexual organs [10, 11],  
60 developing different actions depending on where is located. This receptor is also present in the cell  
61 surface of PC12 cells, a cell line derived from pheochromocytoma of the rat adrenal medulla,  
62 extensively used for testing the biological activity of  $\beta$ -NGF [12]. These cells respond to  $\beta$ -NGF and  
63 they turned from proliferating chromaffin-like cells to non-dividing sympathetic-neuron-like cells that  
64 extend axons or neurites [13]. This effect is produced when  $\beta$ -NGF binds to TrkA and mediates  
65 signaling cascades, such as ERK/MAPK and PI3K/AKT pathways [14].  
66 Recently,  $\beta$ -NGF has been identified as the ovulation-inducing factor (OIF) in the seminal plasma of  
67 some species of reflexive ovulation, as camelids [15-18]. In rabbits, another induced ovulatory  
68 species, the protein and its receptors (TrkA and p75) have been identified in all reproductive male and  
69 female tissues (testes, epididymis and accessory glands of male rabbits [10, 11, 19, 20], and uterus,  
70 oviduct and ovary [21, 22, 23]) as well as in seminal plasma [10, 11, 24]. However, there are no  
71 studies which demonstrate that  $\beta$ -NGF is the OIF in this species, although some kind of ovarian  
72 response in terms of the increase of hemorrhagic follicles (non-ruptured anovulatory follicles full of  
73 blood) have been evidenced using  $\beta$ -NGF of murine species [11], or rabbit SP [16, 25] intramuscularly  
74 injected. Although  $\beta$ -NGF is a highly conserved protein among species [26], a detailed comparison  
75 analysis of the amino acid sequences between induced- and spontaneous-ovulation species, could help  
76 to identify different ovulation patterns among species.

77 In addition,  $\beta$ -NGF has been detected in semen in some other species but its role in sperm physiology  
78 is barely studied. This neurotrophin has been localized in round spermatids and spermatocytes in the  
79 reproductive tract in mouse and rat [27, 28] and it is suggested to intervene in sperm maturation [29,  
80 30]. In ejaculated sperm,  $\beta$ -NGF promotes sperm motility and viability in humans [31, 32], bulls [33]  
81 and golden hamsters [34], and facilitates the acrosome reaction [34]. In rabbits, there are no studies  
82 about the effects of  $\beta$ -NGF in the seminal characteristics of ejaculated semen.

83 We hypothesize that specific substitutions within the amino acid sequence of  $\beta$ -NGF from rabbit may  
84 be relevant for its different physiological action and, consequently, the production and use of a  
85 homologous recombinant rabbit  $\beta$ -NGF can help to enlighten the specific role of this multi-functional  
86 protein as an OIF in this species. Moreover, the potential use of exogenous  $\beta$ -NGF in the seminal dose  
87 could be an assisted reproductive procedure to reduce the handling and costs at the insemination time  
88 in reflex ovulator species but effect in semen must be contrasted. In this context, the aims of the  
89 present study were: 1) to produce and purify recombinant  $\beta$ -NGF from the rabbit prostate amino acid  
90 sequence, verifying its biological activity in PC12 cells, 2) to compare and analyze  $\beta$ -NGF amino acid  
91 sequences from several representative species of induced and spontaneous ovulation, and 3) to assess  
92 recombinant  $\beta$ -NGF effects in sperm viability and motility in a dose-response study. All these aims  
93 were achieved; the protein was produced and purified and their effect in semen was successfully  
94 tested. Some relevant differences were found in the comparison of the  $\beta$ -NGF amino acid sequence  
95 among rabbit and the other species studied.

96

## 97 **Experimental procedures**

### 98 **Production of recombinant rabbit $\beta$ -NGF and functional** 99 **assessment in PC12 cells**

100

#### 101 **Animals, tissue extraction and processing**

102 New Zealand White x California adult male rabbits were housed individually in flat-deck cages with a  
103 light program consisted of 16 h of light and 8 h of darkness, at 20 to 25 °C of temperature and a

104 relative humidity of 60 to 75% maintained by a forced ventilation system. Each animal had free access  
105 to food and water. All the experimental procedures with animals were approved by the Animal Ethics  
106 Committee of the Polytechnic University of Madrid (UPM, Spain), and were in compliance with the  
107 Spanish guidelines for care and use of animals in research [35].

108 Animals (n=3) were euthanized and ventral media laparotomy was performed. Prostate complex was  
109 dissected [36]; the proprostate was discarded and the prostate part was recovered. Portions of 5 mm  
110 were collected in 1.5 mL tubes containing RNA later® Stabilization Solution (Ambion, Thermo Fisher  
111 Scientific, Washington, USA) to avoid RNA degradation. RNA later® was removed from tubes after  
112 being at 4° C overnight and samples were stored at -80° C.

113

#### 114 **Complementary DNA sequencing of rabbit prostate $\beta$ -NGF**

115 To the best of our knowledge, the cDNA sequence from rabbit prostate was not published, thus we  
116 proceeded to sequence it. Therefore, total RNA was isolated using TRIzol reagent (Life Technologies,  
117 Thermo Fisher Scientific, Washington, USA), and then mRNA was obtained with FastTrack® MAG  
118 mRNA Isolation Kit (Ambion, Thermo Fisher Scientific, Washington, USA) according to the protocol  
119 provided by the manufacturer. Afterwards, cDNA was synthesized using a mix of random hexamers  
120 (0.5  $\mu\text{g}/\mu\text{L}$ ) and oligo (dT) primers (0.1  $\mu\text{g}/\mu\text{L}$ ) (SuperScript™ First-Strand Synthesis System for RT-  
121 PCR, Life Technologies, Thermo Fisher Scientific, Washington, USA).

122 Firstly, to sequence the entire *NGF* gene, specific primers were designed (Table 1) for a highly  
123 conserved region of the gene among species. The design was performed taking into account that *NGF*  
124 presents alternative splicing; hence, amino acid and nucleotide sequences of different species were  
125 aligned (Clustal Omega Software and Serial Cloner 2.6 Software) to look for the conserved region.

126 Polymerase chain reaction (PCR) was performed using 1  $\mu\text{l}$  of cDNA as a template for  $\beta$ -*NGF* specific  
127 primers, using the Platinum® Taq DNA Polymerase kit (Invitrogen, Thermo Fisher Scientific,  
128 Washington, USA). Cycling conditions consisted of one first phase of 3 min for denaturation at 95 °C,  
129 followed by 40 cycles of 30 seconds at 95 °C, 30 s at 55 °C and 15 s at 72 °C, and a final phase of 5  
130 min at 72 °C to allow elongation. Negative control without reverse transcriptase was performed in

131 PCR, in order to discard genomic DNA contamination. A 2 % agarose gel was used to visualize the  
132 size of bands of the PCR products (10  $\mu$ l per lane) by a scanner (Bio-Rad Laboratories, California,  
133 USA). The amplified products of 305 pb were purified from the agarose gel with SpeedTools PCR  
134 Clean-up kit (Biotools, B&M Labs, S.A., Madrid, Spain) and sequenced by Sanger method using the  
135 BigDye<sup>TM</sup> Terminator v3.1 Cycle Sequencing Kit (Thermo Fisher Scientific, Washington, USA) in a  
136 3730XL DNA Analyzer sequencer (Applied Biosystems, Thermo Fisher Scientific, Washington,  
137 USA).

138 **Table 1. Specific primers for a conserved region of beta-NGF.**

| Primer<br>$\beta$ -NGF | 5' – 3' sequence      | T <sub>m</sub> (° C) | Multiplex<br>(Kcal/mol) | Product length<br>(nucleotides) |
|------------------------|-----------------------|----------------------|-------------------------|---------------------------------|
| Forward                | AGCCCACTGGACTAAACTGCA | 61.3                 |                         |                                 |
| Reverse                | TCGCACACCGAGAACTCTCC  | 62.5                 | -1.88                   | 305                             |

139 T<sub>m</sub>: Melting temperature (theoretical), calculated by OligoAnalyzer software.

140 Multiplex: complementarity enthalpy between both primers.

141

142 Once sequenced the conserved region of *NGF*, the Rapid Amplification of cDNA Ends (RACE)  
143 procedure was used to obtain the 5' and 3' sequences, based on Frohman et al. [37] using SMARTer®  
144 RACE 5'/3' kit (Clontech Laboratories, California, USA). Inner and outer primers were designed  
145 following the kit protocol (Table 2), as well as the cycling conditions of PCRs, using a melting  
146 temperature of 68° C.

147

148 **Table 2. Specific primers designed for Rapid Amplification of cDNA Ends (RACE) procedure.**

| Primer   | 5' – 3' sequence             | T <sub>m</sub> (°C) |
|----------|------------------------------|---------------------|
| 3' outer | GGGCAGACCCGCAACATCACCGT      | 70                  |
| 3' inner | CCCCAGACTTTTTAAGAAACGACGCCTG | 70.1                |
| 5' outer | TCGCACACCGAGAACTCTCCCATGTG   | 71                  |
| 3' inner | GTCCACCTCCAGGTCCAGCTCCT      | 70                  |

149 T<sub>m</sub>: Melting temperature (theoretical), analyzed by OligoAnalyzer software.

150

## 151 **Plasmid production and transfection**

152 Our rabbit prostate *NGF* sequence (KX528686) with a 7 x histidine tag in the C-terminal end was  
153 inserted in a pD2539-CEF plasmid with kanamycin and puromycin resistance (DNA 2.0, California,  
154 USA). Plasmid was produced in large quantities in bacterial cells (Stellar™ Competent Cells,  
155 ClonTech Laboratories, California, USA) using LB medium containing 25 µg/ml of kanamycin. They  
156 were incubated at 37° C by shaking during 24 h. Plasmid was extracted by Megaprep (PureLink®  
157 HiPure Plasmid Megaprep Kit, Thermo Fisher Scientific, Washington, USA) and then precipitated  
158 with isopropanol/ethanol. The resulting DNA was cut with the restriction enzyme Sal I to linearize the  
159 plasmid and then transfected with Lipofectamine® 2000 Reagent (Invitrogen, Thermo Fisher  
160 Scientific, Washington, USA) into Chinese Hamster Ovary (CHO) cells (ATCC, Virginia, USA).

161

## 162 **CHO cells culture and protein purification**

163 Transfected CHO cells were firstly cultivated in F12 medium supplemented with HEPES 25 mM  
164 (Gibco, Thermo Fisher Scientific, Washington, USA), 10% fetal bovine serum (FBS, Gibco® One  
165 Shot FBS, Thermo Fisher Scientific, Washington, USA), 125 µg/ml gentamicin (Invitrogen, Thermo  
166 Fisher Scientific, Washington, USA) and 5 µg/ml puromycin (Thermo Fisher Scientific, Washington,  
167 USA). Afterwards, 500,000 viable cells/ml were subcultured in a T-160 cc flask (Thermo Fisher  
168 Scientific, Washington, USA) in Serum Free Medium (CHO-S-SFM II, with hypoxanthine and  
169 thymidine, Thermo Fisher Scientific, Washington, USA) supplemented with 50 µg/ml gentamicin and  
170 5 µg/ml puromycin for 4 days and shaken on a shaker platform. All cell cultures were incubated in a  
171 humidified incubator (NuAire, Minnesota, USA) at 37°C and 5% CO<sub>2</sub>.

172 Recombinant rabbit β-NGF (rrβ-NGF) purification from the culture medium was made by affinity  
173 chromatography, using columns containing Nickel (HisXL-Column High Density NICKEL, Agarose  
174 Bead Technology, Florida, USA) in order to select only those proteins with the histidine tag. Columns  
175 were equilibrated with 5 column bed volume of binding buffer (20 mM disodium phosphate, 500  
176 mMNaCl, 10 mM imidazole at pH 7.5) and culture media was added, keeping in contact with the resin

177 for 15 min. Then, after several washes of the column with binding buffer, the protein was eluted in 10  
178 mL of elution buffer (20 mM Disodium phosphate, 500 mM NaCl, 500 mM Imidazole) and then  
179 dialyzed in HEPES 10  $\mu$ M for PC12 bioassay, or in phosphate buffer saline 0.01M (PBS tablet,  
180 Sigma-Aldrich, Missouri, USA) for rabbit sperm bioassay in order to maintain semen viability.  
181 Dialysis was performed by shaking at 4° C, changing the medium 3 times with a minimum of 3 h  
182 dialyzing per time. Protein concentration was measured by the Bradford method [38].

183

## 184 **Western Blot analysis**

185 To verify the presence of  $\text{rr}\beta$ -NGF, aliquots of dialyzed protein were subjected to TCA-acetone  
186 precipitation and then denatured in loading buffer (0.312 M Tris-HCl, 10% SDS, 25% 2-  
187 mercaptoethanol, 0.01% bromophenol blue, 50% glycerol) at 95°C. Afterwards, they were loaded on  
188 12% SDS-PAGE gels and were run at 90 V for 2 h. One gel was stained using Coomassie (Sigma  
189 Aldrich, Missouri, USA) and the other one was used to transfer the protein to a nitrocellulose  
190 membrane (Amersham™ Hybond ECL Nitrocellulose Membrane, GE Healthcare Life Science,  
191 Barcelona, Spain) (80 mA per membrane for 80 min). Membrane was blocked during 1 h using  
192 Odyssey® Blocking Buffer (LI-COR Biosciences, Nebraska, USA), and then incubated at 4°C  
193 overnight with goat anti-NGF antibody (0.1  $\mu$ g/mL) (N8773, Sigma-Aldrich) in blocking buffer with  
194 0.1% Tween 20. After several washes, membranes were incubated at room temperature (RT) for 1 h  
195 with secondary antibody (IRDye® 800CW Donkey anti-Goat IgG (H + L), LI-COR Biosciences,  
196 Nebraska, USA). After several washes, membranes were scanned with an Odyssey fluorescence  
197 scanner (LI-COR Bioscience, Nebraska, USA).

198

## 199 **MALDI-TOF mass spectrometry analysis**

200 For mass spectrometry analysis, SDS-PAGE and Coomassie staining were performed with the  
201 synthesized protein as described above, and gel bands of 13-15 kDa were manually excised from gels.  
202 The experimental procedure was executed as previously published [11]. For protein identification, the



203 sequence of rabbit prostate NGF (KX528686) was searched using MASCOT v 2.3  
204 ([www.matrixscience.com](http://www.matrixscience.com)) through the Global Protein Server v 3.6 from ABSCIEX.

205

## 206 **PC12 cell culture**

207 For PC12 cells culture, cells were thawed at 37°C, centrifuged at 1800 x g 5 min to remove DMSO  
208 from freezing and then plated in a T-75 cc flask. They were cultured in Dulbecco Modified Eagle  
209 Medium (DMEM, high glucose, HEPES) supplemented with 0.2 mM pyruvate, 10% horse serum  
210 (heat inactivated, New Zealand origin), 5% FBS and 50 µg/ml of gentamicin. All reagents were  
211 purchased from Thermo Fisher Scientific (Washington, USA). Medium was changed every 48 h, and  
212 cells were maintained in a humidified incubator at 37°C and 5% CO<sub>2</sub>. PC12 cells were seed at a  
213 density of 15,000 cells/500 µl in 24-well plates and grown for 24 h in a 37°C incubator. Culture media  
214 was added every 48 h with different concentrations of rrβ-NGF eluted in HEPES 10 µM: 0, 5, 10, 25,  
215 50 and 100 ng/ml, respectively. Different concentrations were run in triplicates and each experiment  
216 was repeated 3 times.

217

## 218 **MTT assay**

219 To determine the possible cytotoxicity of rrβ-NGF treatment in PC12 cells, we assessed cellular  
220 viability at 48 h using 3-(4,5-dimethylthiazol-2-yl)-2,5-diphenyltetrazolium bromide (MTT, M6494,  
221 Thermo Fisher Scientific, Washington, USA) assay. After discarding the media of wells, 200 µl of 500  
222 µg/ml MTT in Locke medium (140 mM NaCl, 4.5 mM KCl, 2.5 mM CaCl<sub>2</sub>, 1.2 mM KH<sub>2</sub>PO<sub>4</sub>, 1.2  
223 mM MgSO<sub>4</sub>, 5.5 mM glucose, 10 mM HEPES) were added in each well and incubated for 2 h at 37°C.  
224 Then, 200 µl of solubilization buffer (0.1 M HCl, 1% Triton X-100 in isopropanol) were added and  
225 incubated for 1 h at RT to solubilize the formazan crystals. Sterile cell scrapers (Lab Clinics,  
226 Barcelona, Spain) were used to scratch the wells and the volume of each well was collected in tubes  
227 containing 0.9 mL of distilled water. The optical density (OD) of each sample was then measured at  
228 560 nm using UltraSpec III spectrophotometer (Pharmacia LKB, GE Healthcare Life Science,

229 Barcelona, Spain). The data were analyzed in terms of the percentage of cell viability, calculated by  
230 the equation: (OD treated cells / OD not treated cells) x 100.

231

## 232 **Differentiation and neurite outgrowth assessment**

233 In the moment of the bioassay, PC12 cells were plated in wells pre-coated with 7  $\mu\text{g}/\text{cm}^2$  of collagen  
234 type IV (C6745, Sigma-Aldrich, Missouri, USA) at the same concentrations of  $\text{rr}\beta\text{-NGF}$  eluted in  
235 HEPES 10  $\mu\text{M}$  described before. In each concentration plate, 5 images of a minimum of 100 cells  
236 were taken with a light microscope (Leica F550, Wetzlar, Germany) equipped with phase contrast  
237 optics and a DCF400 camera (Leica). The morphological differentiation of these cells was assayed by  
238 determining the percentage of differentiated cells (loss of round shape), the percentage of cells with  
239 neurite elongations and by measuring the length of the longest neurite per cell at Day 8 with ImageJ  
240 software (<https://imagej.nih.gov/ij/>), according to Haas et al. [39]. Cellular elongations were  
241 considered as neurites when their length was one cell diameter at least [39].

242

## 243 **Immunofluorescence against anti- $\beta$ -III tubulin**

244 The neuronal differentiation of PC12 supplemented with  $\text{rr}\beta\text{-NGF}$  was evaluated by  
245 immunofluorescence against anti- $\beta$ -III tubulin antibody, a microtubule element of the tubulin family  
246 found almost exclusively in neurons [40]. First, PC12 cells were cultured in 24-well plates in DMEM  
247 supplemented as described above, in covers treated with polylysine (Biochrom, Cambridge, UK).  
248 Twenty five  $\text{ng}/\text{ml}$   $\text{rr}\beta\text{-NGF}$  (the best concentration found in the previous analyses) were added 24 h  
249 after the beginning of the cell culture and changed every 48 h. At Day 8 of treatment, the medium was  
250 removed and cells were washed with 0.1M PBS (16 mM  $\text{NaH}_2\text{PO}_4 \cdot 2\text{H}_2\text{O}$ , 84 mM  $\text{Na}_2\text{HPO}_4$ ), fixed in  
251 4% paraformaldehyde for 15 min at RT and treated with 0.1% Triton X-100 in PBS for 10 min at RT  
252 to permeabilize the cell membrane. After several washes, cells were blocked with 10% FBS in PBS for  
253 45 min at RT to avoid non-specific binding and then, incubated with mAb against  $\beta$ -III tubulin  
254 (ab52623, Abcam, Cambridge, UK) at 1:50 dilution and 4°C overnight. Next, cells were washed with  
255 PBS and incubated with goat anti-rabbit IgG H&L (Alexa Fluor® 488) secondary antibody

256 (ab150081, Abcam, Cambridge, UK) diluted 1:500 for 1h at RT. After washing in PBS, cells were  
257 incubated for 15 min at 4°C in PBS with 15 µg/ml Hoescht (B2261, Sigma-Aldrich, Missouri, USA).  
258 Covers were washed in PBS, rinsed in distilled water and mounted in a slide with mounting medium  
259 for immunofluorescence (VectaShield, VectaStain, Vector Laboratories, California, USA). The  
260 samples were observed by laser-scanning confocal microscopy (Leica TCS SP5, Wetzlar, Germany),  
261 using a 351/364 and 488 nm excitation lasers for visualize Hoescht and anti-β-III tubulin, respectively.

262

### 263 **Trk receptor inhibition assay**

264 To assure that rrβ-NGF was the responsible for PC12 cell differentiation into neuron-like cells, a  
265 specific inhibitor of the tyrosine protein kinase activity of the tyrosine kinase family (K-252a) was  
266 used in order to selectively block the effect of β-NGF in these cells. PC12 cells were incubated as  
267 previously described and K-252a (Sigma Aldrich, Missouri, USA) was added 24 h post-seeding at 100  
268 nM and incubated for 2 h at 37°C. Then, three experimental groups were allocated: A) non-treated  
269 cells, B) cells treated with 25 ng/ml rrβ-NGF and, C) cells treated with 25 ng/ml rrβ-NGF and k252a,  
270 as mentioned before. The percentage of differentiated cells was assessed after 48 h of challenge with  
271 Trk inhibitor.

272

### 273 **Study of the amino acid sequence of rabbit β-NGF**

274 Full protein sequence of the rabbit prostate NGF (KX528686) was aligned with amino acid sequences  
275 of some species of induced ovulation (*Camelus dromedarius*, *Camelus bactrianus*, *Vicugna pacos*)  
276 and some species of spontaneous ovulation (*Rattus norvegicus*, *Mus musculus*, *Bos taurus*, *Homo*  
277 *sapiens*) using Clustal Omega Software. Glycosylation sites, disulfide bond sites, the signal peptide,  
278 the pro-peptide, the beta chain and the receptor binding sites were indicated in the output results of  
279 Clustal and were compared among species.

280

### 281 **In vitro assessment of sperm viability and motility with different** 282 **concentrations of rrβ-NGF in semen samples**

283

## 284 **Animals, facilities and semen extraction**

285 Six New Zealand White x California male adult rabbits (*Oryctolagus cuniculus*) held on the  
286 experimental farm at the Agrarian Production Department, Polytechnic University of Madrid (Spain),  
287 were used in this experiment. Semen was collected every week routinely in the farm by artificial  
288 vagina with a sexually receptive female.

289

## 290 **Addition of rr $\beta$ -NGF to semen samples**

291 After removing the gel fraction, mass motility of each sample was assessed and samples with the  
292 highest values were pooled to a final mean concentration of  $383.4 \pm 71.4 \times 10^6$  sperm/ml and  
293 submitted to different doses of rr $\beta$ -NGF, depending on the experimental group. The doses were chosen  
294 according to  $\beta$ -NGF concentrations found in seminal plasma [10, 41, 42]. Hence the experimental  
295 groups were: 0, 2, 20 and 100 ng/ml of rr $\beta$ -NGF. PBS was added in 0 ng/ml group instead of rr $\beta$ -NGF  
296 (negative control group).

297

## 298 **Sperm viability and motility analysis**

299 Sperm viability and motility were assessed after 0, 1 and 2 h of rr $\beta$ -NGF challenge. Semen samples of  
300 each group at experimental times were collected for the assessment of sperm viability with nigrosin  
301 staining. Sperm motility was evaluated by Computer Assisted Semen Analysis (CASA), using the  
302 Motility module of the Sperm Class Analyzer (SCA®) version 5.2 (Microptic S.L., Barcelona, Spain).  
303 A minimum of 200 sperm cells per experimental group were recorded at each time. Then, parameters  
304 related to sperm motility were studied: static percentage (STAT, %), percentage of non-progressive  
305 sperm (NPMOT, %), velocity [curve-linear velocity (VCL,  $\mu\text{m/s}$ ), straight-line velocity (VSL,  $\mu\text{m/s}$ ),  
306 average path velocity (VAP,  $\mu\text{m/s}$ )] and percentages of linearity (LIN, %), straightness (STR, %) and  
307 wobble (WOB, %). This experiment was repeated 3 times.

308

## 309 **Statistical analysis**

310 The data were analyzed using the SAS software version 9.0 (Statistical Analysis System Institute Inc,  
311 Cary, NC, USA). For the analyses of cell viability and neurite length of PC12 cells, a one-way  
312 ANOVA (GLM procedure in SAS) was used with  $\beta$ -NGF concentration (0, 5, 10, 25, 50 and 100  
313 ng/ml) as fixed effect. For analyzing the differentiation and the neurite outgrowth of PC12 cells over  
314 time, we performed a two-way ANOVA with repeated measures (MIXED procedure in SAS), with  $\beta$ -  
315 NGF concentrations (0, 5, 10, 25, 50 and 100 ng/ml) and days of evaluation (2, 4, 6 and 8) as fixed  
316 effects, including also the interaction between these two fixed effects in the statistical model. To  
317 assess the effect of the protein concentration in the sperm, a two-way ANOVA was performed with  $\beta$ -  
318 NGF concentration (0, 2, 20 and 100 ng/ml) and time (0, 1 and 2 h) as fixed effects and the interaction  
319 between them was included in the statistical model too. All the variables are shown as mean  $\pm$  s.e.m.  
320 and means were compared using Fisher test, considering significant differences when p-value  $<$  0.05.

321

## 322 **Results**

### 323 **Production of recombinant rabbit $\beta$ -NGF and functionality in** 324 **PC12 cells**

325 The complete nucleotide sequence of *NGF* from rabbit prostate was sequenced from cDNA by RACE  
326 procedure and submitted to the GenBank database, with the reference number KX528686.

327 rr $\beta$ -NGF was found to be expressed in the culture media of CHO cells transfected with the plasmid  
328 pD2539-CEF-rr $\beta$ -NGF. A unique band of approx. 13-15 kDa was revealed by western blot.

329 Furthermore, the corresponding protein band extracted from the SDS-PAGE gel once analyzed by  
330 fingerprint analysis combined with mass spectrometry (MALDI-TOF) showed a high score with the  
331 rabbit  *$\beta$ -NGF* gene sequence inserted into the plasmid (KX528686).

332 Cellular viability of PC12 cells was similar for all doses of rr $\beta$ -NGF challenged, except for the highest  
333 dose (100 ng/ml). This latter dose displayed a significant lower percentage of viability in comparison  
334 with rr $\beta$ -NGF doses of 5, 10 and 25 ng/ml (p $<$ 0.05) but similar to 50 ng/ml and 0 ng/ml doses that  
335 showed intermediate values (Fig 1A).

336

337 **Fig 1. Dose-response study at different concentrations of rrβ-NGF (0, 5, 10, 25, 50 and 100**  
338 **ng/ml) in PC12 cells.**

339 (A) Percentage of viability of PC12 cells after 48 h of culture at different rrβ-NGF concentrations.  
340 Different letters indicate significant differences between doses tested ( $p < 0.05$ ). (B) Percentage of  
341 differentiated PC12 cells over time (until Day 8) in culture with different rrβ-NGF concentrations.  
342 Different letters indicate significant differences in the same day between doses tested ( $p < 0.05$ ). (C)  
343 Percentage of PC12 cells bearing neurites over time (until Day 8) in culture with different rrβ-NGF  
344 concentrations. Different letters indicate significant differences in the same day between doses tested  
345 ( $p < 0.05$ ). (D) Neurite length ( $\mu\text{m}$ ) of PC12 cells at Day 8 cultured with different rrβ-NGF  
346 concentrations. Different letters indicate significant differences between doses tested ( $p < 0.05$ ). All  
347 data are represented as mean  $\pm$  SEM.

348

349 The percentage of PC12 cells differentiation was significantly higher in all rrβ-NGF concentrations  
350 groups than in the negative control group in all days evaluated (Fig 1B,  $p < 0.05$ ). At Day 2, rrβ-NGF  
351 25 ng/ml triggered the highest percentage of differentiated cells, followed by the 50 ng/ml dose. At  
352 Day 4, cells treated with 25, 50 or 100 ng/ml presented the highest differentiation percentage, whereas  
353 the 10 ng/ml concentration group had the lowest one but still higher than the negative control. At Day  
354 6, all rrβ-NGF treated groups presented the same differentiation percentage. At the end of the  
355 experiment (Day 8), the highest rate of differentiated cells was again found in 25, 50 and 100 ng/ml  
356 rrβ-NGF groups.

357 The percentage of cells with at least one neurite was not significantly different at Day 2 (Fig 1C).  
358 However, at Day 4, groups with 5, 25 and 50 ng/ml rrβ-NGF showed higher percentage of cells with  
359 neurites than 0 ng/ml group, whereas 10 and 100 ng/ml groups showed intermediate values. At Day 6  
360 the percentage of cells with neurites was higher in 50 ng/ml group than all others, and 5 ng/ml group  
361 presented intermediate values, followed by the rest of rrβ-NGF groups. At Day 8, the rrβ-NGF treated  
362 cells with 25 ng/ml had the highest rate of cells with neurites, followed by the 50 ng/ml treatment.

363 Moreover, all rr $\beta$ -NGF groups showed longer neurites at Day 8 than the negative group (0 ng/ml  
364 dose). The average length of neurites was significantly higher in the group with the 25 ng/ml  
365 concentration than in the groups with lower concentrations (5 and 10 ng/ml), while cells treated with  
366 50 and 100 ng/ml had intermediated average lengths (Fig 1D).

367 PC12 cells treated with 25 ng/ml of rr $\beta$ -NGF were positive for immunofluorescence with  $\beta$ -III tubulin  
368 at Day 8 of treatment (Fig 2) showing high fluorescence in all cytoplasm of the soma and in neurites.  
369 Cells cultured without rr $\beta$ -NGF did not show any expression of  $\beta$ -III tubulin.

370

371 **Fig 2. Immunofluorescence of PC12 cells treated with 25 ng/ml rr $\beta$ -NGF at Day 8 against  $\beta$ -III**  
372 **tubulin.** Green signal represents the binding to  $\beta$ -III tubulin (soma and neurites) and blue signal is the  
373 nucleus stained with Hoescht 33342. Right panel is negative control (not incubated with primary  
374 antibody).

375

376 Finally, in the inhibition assay, PC12 cells did not show any differentiation or neurite growth after 48  
377 h of culture in co-treatment with K-252a and rr $\beta$ -NGF (Fig 3). The percentage of cell differentiation in  
378 positive control group was significantly higher than in the negative control group ( $72.21 \pm 1.00$  vs.  
379  $20.51 \pm 2.81\%$ , respectively,  $p < 0.05$ ).

380

381 **Fig 3. Inhibition of TrkA assay in PC12 cells.** A: non-treated cells (negative control), B: cells treated  
382 with 25 ng/ml rr $\beta$ -NGF (positive control) and C: cells treated with k252a+25 ng/ml rr $\beta$ -NGF. Arrow:  
383 neurite. Scale bar: 100  $\mu$ m.

384

### 385 **$\beta$ -NGF protein sequence comparison among species**

386 The amino acid alignment of rr $\beta$ -NGF with other species revealed that the signal peptide, the 3  
387 glycosylation sites (Asn<sup>69</sup>, Asn<sup>114</sup>, Asn<sup>166</sup>), all the Cys that constitute the 3 disulfide bonds (Cys<sup>136</sup> –  
388 Cys<sup>201</sup>, Cys<sup>179</sup> – Cys<sup>229</sup>, Cys<sup>189</sup> – Cys<sup>231</sup>) as well as Trp<sup>142</sup> and Ile<sup>152</sup>, important for TrkA and p75  
389 binding, were conserved in all species studied (spontaneous or not; Fig 4). In reflex-ovulation species,



390 the N-terminal region of the beta chain of NGF, where  $\beta$ -NGF binds to its high-affinity receptor,  
391 presents the tandem Ala-Pro, whereas in spontaneous ovulators there is a corresponding Ser residue.  
392 Furthermore, specifically in rabbit, there is not a Ser after Ala-Pro, as in the rest of reflex-ovulation  
393 species. The majority of the amino acids related to the binding to p75 are conserved among species,  
394 except a sequence that is slightly different: KGNEVKVL in rabbit *versus* KGKEVMVL in the rest of  
395 studied species.

396

397 **Fig 4. Amino acid sequence alignment of  $\beta$ -NGF** from induced (IND, NGF\_KX528686 from  
398 *Oryctolagus cuniculus*, KX528686; OIF from SP of *Lama lama*, 4EFV\_B; *Camelus dromedarius*,  
399 XP\_010979007.1; *Vicugna pacos*, XP\_015102944.1; *Camelus bactrianus*, XP\_010967135.1) or  
400 spontaneous (SPONT, *Rattus norvegicus*, NP\_001263984.1; *Mus musculus*, NP\_001106168.1; *Bos*  
401 *Taurus* NP\_001092832.1, *Homo sapiens*, NP\_002497.2) ovulation species. The signal peptide is  
402 indicated in a box. Underlying aa (N<sup>69</sup>, N<sup>114</sup> and N<sup>166</sup>) show glycosylation sites of Pro-NGF. Beta  
403 chain of  $\beta$ -NGF is shaded in light grey. Cys involved in disulfide bonds are highlighted in dark grey  
404 (Cys<sup>136</sup>, Cys<sup>179</sup>, Cys<sup>189</sup>, Cys<sup>201</sup>, Cys<sup>229</sup>, Cys<sup>231</sup>). Amino acids that participate in both TrkA and p75  
405 binding are in bold (Trp<sup>142</sup> and Ile<sup>152</sup>). TrkA binding sites are indicated in black boxes (N-terminal,  
406 Phe<sup>175</sup>, Phe<sup>207</sup>). P75 binding sites are in white and highlighted in black. The differences observed in  
407 rabbit beta chain are in white color.

408

#### 409 **Effect in rabbit sperm cells of rr $\beta$ -NGF addition in semen**

410 Sperm viability (Fig 5A) and the percentage of static sperm (Fig 5B) were similar for all the  
411 concentrations of rr $\beta$ -NGF added to semen. CASA parameters related to the progression of the motion  
412 (NPMOT, Fig 5C; LIN, Fig 5G; STR, Fig 5H; WOB, Fig 5I) were affected by the highest  
413 concentration at 2 h, showing a decrease of progressive motion comparing to lower concentrations of  
414 rr $\beta$ -NGF. In addition, there were differences concerning to these parameters between 0 and 2 h in 20  
415 and 100 ng/ml groups. However, the velocity parameters VCL (Fig 5D) and VAP (Fig 5F) presented



416 higher rates in the 100 ng/ml group at 2h compared to groups with lower doses, and to 0h. In contrast,  
417 this group showed the lowest percentages for VSL.

418

419 **Fig 5. Sperm viability (A) and seminal motility parameters assessed by CASA (B-I) at 0, 1 and 2**  
420 **h after addition of different doses of rr $\beta$ -NGF (0, 2, 20 and 100 ng/ml) to semen samples.**

421 Statistical differences are indicated by \* ( $p < 0.05$ ). Data are represented as mean  $\pm$  SEM.

422

## 423 Discussion

424 In the present work, we have sequenced *NGF-mRNA* from rabbit prostate and produced and purified  
425 its corresponding recombinant rabbit  $\beta$ -NGF, which was able to differentiate PC12 cells into neuron-  
426 like cells. The comparison of the amino acid sequence of rabbit NGF with other induced and  
427 spontaneous-ovulator species has revealed species-specific differences, mainly in the receptor binding  
428 sites. Furthermore, we assessed the effects of the addition of this neurotrophin to rabbit sperm with the  
429 aim of verify the possibility of its addition in the seminal dose to improve the breeding systems in  
430 reflex ovulator species.

431 One of the challenges in the production of the recombinant proteins is the post-translational  
432 modifications, which can be achieved using the intracellular engineering of mammalian cells, such as  
433 CHO cells [3]. Thus, the transfection of the plasmid containing rabbit  $\beta$ -NGF in these cells resulted in  
434 the successful production of the native protein with an appropriate molecular weight (confirmed by  
435 western blot) and amino acid sequence (verified by MALDI-TOF), and the proper biological activity  
436 (cellular differentiation by neurite proliferation in PC12 cells). rr $\beta$ -NGF maintained PC12 viability  
437 regardless the concentration tested. However, 25 and 50 ng/ml treated cells presented the highest  
438 percentages of cell differentiation and neurite/cell during all the study, showing also a higher neurite  
439 growth as previously described [14]. In contrast, Gunning et al. [43] noticed that higher concentrations  
440 of mouse  $\beta$ -NGF than those used in the current study (150 ng/ml) can progressively increase the  
441 percentage of cells with neurites. Probably, the origin of  $\beta$ -NGF can affect PC12 cells differentiation  
442 due to the affinity to TrkA receptor [44].

443 Protein sequence of the rabbit  $\beta$ -NGF revealed some changes compared to other species in the binding  
444 sites to its receptors. Two consecutive residues Ala-Pro were found in the N-terminal region of rabbit  
445  $\beta$ -NGF important for binding to TrkA, as in all species of induced ovulation. This association may  
446 indicate a different strength degree in the union to TrkA, since Pro has a special structure that may  
447 facilitate an angle of a greater torsion. Conversely, after this tandem of amino acids, a Ser residue is  
448 found in all of the species studied, except in rabbits. This missing residue may be relevant to create a  
449 more stable configuration through the torsion facilitated by the previous Pro. Furthermore, two amino  
450 acid residues which participate in the recognition of the low-affinity receptor p75 [45] presented also  
451 mutations in the rabbit sequence. Thus, Asn<sup>155</sup> substitutes the conserved Lys, and Lys<sup>158</sup> replaces also a  
452 conserved Met. The Lys residue has a positive charge and repels the protonated histidine within the  
453 binding site of p75. Its change to Asn residue, which has a neutral charge, may promote a closeness of  
454  $\beta$ -NGF to its low-affinity receptor. We have recently reported the expression and localization of TrkA  
455 [46] and of p75 [20] in rabbit male genital tract evidencing that it probably has a role in rabbit  
456 reproduction. Despite the presence of these meaningful differences in amino acid sequence located at  
457 the binding domains to the receptors, some biological functions of the rabbit  $\beta$ -NGF appeared in  
458 parallel to other species. In llama females, rabbit seminal plasma produced ovulation at the same level  
459 as llama seminal plasma [16], thus the interaction with the receptor does not seem to be modified in  
460 other species. However, llama seminal plasma is not able to elicit the ovulation in rabbits [16], so it  
461 could indicate that these specific residues found in the rabbit amino acid sequence may explain in part  
462 some of the particular physiological characteristics in the rabbit ovulation process. In any case, it has  
463 to be taken into consideration the different sexual stimulation to trigger ovulation that occurs in both  
464 species and the high number of components of the seminal plasma. Further studies about mechanisms  
465 of rabbit  $\beta$ -NGF in the female reproductive tract are needed to elucidate its role.

466  $\beta$ -NGF is present in the seminal plasma of several species and its high- and low-affinity receptors have  
467 been found in the head and tail of bovine [33] and human [47] sperm cells. Hence, the addition of  $\beta$ -  
468 NGF in semen presumably induces an effect in sperm. In the present study, the viability and the  
469 percentage of static sperm were unaffected by rr $\beta$ -NGF addition. In contrast, the motion pattern of the  
470 sperm was influenced in a dose- and time-dependent manner. The highest dose (100 ng/ml) and the

471 longest time (2 h) in rr $\beta$ -NGF addition study in semen provoked a reduction of sperm progressivity.  
472 The data found in other species are hardly comparable to this study since the  $\beta$ -NGF concentrations  
473 and times of image captures were not equivalent. Nevertheless, in golden hamster, motility parameters  
474 at the time of the supplementation with 100 ng/ml of  $\beta$ -NGF did not seem to be affected compared  
475 with sperm without  $\beta$ -NGF [34]. In humans, the motility pattern and velocity appear to be improved  
476 with  $\beta$ -NGF doses of 1 and 10  $\mu$ M and with 1 h of incubation [31, 48]. However, it is remarkable that  
477 rr $\beta$ -NGF had not negative effects in the moment of the addition and maintains the sperm viability over  
478 time. These findings could be interesting for the use of this neurotrophin in the seminal doses for  
479 experimental studies of ovulation or female fertility.

480 In conclusion, the differentiation of PC12 cells together with the appearance of  $\beta$ -III tubulin and the  
481 absence of neurite growth in the presence of TrkA inhibitor confirm that this novel recombinant rabbit  
482  $\beta$ -NGF produced in CHO cells is a functional protein. This protein has some unique amino acid  
483 residues in the binding sites of the receptors, which may help to understand some of the particularities  
484 in the reproductive physiology of rabbit. In addition, the exogenous addition of rr $\beta$ -NGF to ejaculated  
485 rabbit sperm maintained viability and progressive motility of spermatozoa. Therefore, this new  
486 recombinant protein could be potentially used by the intravaginal via to elicit ovulation in rabbits and  
487 maybe in other reflex ovulator females.

488

## 489 **Author contributions**

490 Conceptualization: JM Bautista, RM Garcia-Garcia, PG Rebollar, PL Lorenzo.

491 Formal analysis: A Sanchez-Rodriguez, RM Garcia-Garcia, PG Rebollar.

492 Funding Acquisition: RM Garcia-Garcia, PG Rebollar, PL Lorenzo, M Arias-Alvarez.

493 Investigation: A Sanchez-Rodriguez, P Abad, M Arias-Alvarez, RM Garcia-Garcia.

494 Methodology: A Sanchez-Rodriguez, P Abad, JM Bautista.

495 Supervision: RM Garcia-Garcia, PG Rebollar, PL Lorenzo, JM Bautista.

496 Writing – Original draft preparation: A Sanchez-Rodriguez, RM Garcia-Garcia

497 Writing – Review and Editing: All the authors

498

## 499 **Acknowledgements**

500 We would like to thank Dr. P. Serranillos and Dr. Juan Tamargo (Dept. Pharmacology,  
501 Pharmacognosy and Experimental Pharmacology, UCM) for kindly providing PC12 cells and CHO,  
502 respectively. Also, we gratefully acknowledge B. Muñoz Velasco for its technical assistant in the  
503 rabbit farm, B. Aguado Zorrilla for helping in image analysis and L. Gutierrez from Proteomic Service  
504 of UCM for her invaluable help in this work.

505 **Grant support:** This work was supported by the Ministry of Economy and Competitiveness of Spain  
506 [grant AGL2015-65572-C2], Predoctoral Contract UCM-Santander of ASR and a Young Employment  
507 Contract from Consejería de Educación, Juventud y Deporte from Madrid Community and European  
508 Social Fund of PA.

## 510 **References**

- 511 1. Cohen S, Levi-Montalcini R, Hamburger V. A Nerve Growth-stimulating factor isolated from  
512 Sarcom as 37 and 180. Proc Natl Acad Sci U S A. 1954;40: 1014-1018.
- 513 2. Suter U, Heymach Jr JV, Shooter EM. Two conserved domains in the  $\beta$ -NGF propeptide are  
514 necessary and sufficient for the biosynthesis of correctly processed and biologically active NGF.  
515 EMBO Journal. 1991;10: 2395-2400.
- 516 3. Xu L, Li Y, Shi X, Han C, Tao L, Yang Q, et al. Expression, purification, and characterization of  
517 recombinant mouse nerve growth factor in Chinese hamster ovary cells. Protein Expr Purif.  
518 2014;104C: 41-49.
- 519 4. Bradshaw RA, Murray-Rust J, Ibanez CF, McDonald NQ, Lapatto R, Blundell TL. Nerve growth  
520 factor: structure/function relationships. Protein Sci. 1994;3: 1901-1913.
- 521 5. Kliemannel M, Golbik R, Rudolph R, Schwarz E, Lilie H. The pro-peptide of proNGF: structure  
522 formation and intramolecular association with NGF. Protein Sci. 2007;16: 411-419.
- 523 6. Iwane M, Kitamura Y, Kaisho Y, Yoshimura K, Shintani A, Sasada R, et al. Production,  
524 purification and characterization of biologically active recombinant human nerve growth factor.  
525 Biochem Biophys Res Commun. 1990;171: 116-122.
- 526 7. Holtzman DM, Li Y, Parada LF, Kinsman S, Chen CK, Valletta JS, et al. p140trk mRNA marks  
527 NGF-responsive forebrain neurons: evidence that trk gene expression is induced by NGF. Neuron.  
528 1992;9: 465-478.
- 529 8. Pincelli C, Marconi A. Autocrine nerve growth factor in human keratinocytes. J Dermatol Sci.  
530 2000;22: 71-79.
- 531 9. Caporali A, Emanuelli C. Cardiovascular actions of neurotrophins. Physiol Rev. 2009;89: 279-308.
- 532 10. Maranesi M, Zerani M, Leonardi L, Pistilli A, Arruda-Alencar J, Stabile A, et al. Gene expression  
533 and localization of  $\beta$ -NGF and its cognate receptors NTRK1 and NGFR in the sex organs of male  
534 rabbits. Reprod Domest Anim. 2015;50: 918-925.

- 535 11. Garcia-Garcia RM, Masdeu MM, Sanchez-Rodriguez A, Millan P, Arias-Alvarez M, Sakr OG, et  
536 al.  $\beta$ -nerve growth factor identification in male rabbit genital tract and seminal plasma and its role in  
537 ovulation induction in rabbit does. *Ital J Anim Sci.* 2018;17(2): 442-453.
- 538 12. Greene LA, Tischler AS. Establishment of a noradrenergic clonal line of rat adrenal  
539 pheochromocytoma cells which respond to nerve growth factor. *Proc Natl Acad Sci U S A.* 1976;73:  
540 2424-2428.
- 541 13. Grau CM, Greene LA. Use of PC12 cells and rat superior cervical ganglion sympathetic neurons  
542 as models for neuroprotective assays relevant to Parkinson disease. *Methods Mol Biol.* 2012;846: 201-  
543 211.
- 544 14. Song EJ, Yoo YS. Nerve growth factor-induced neurite outgrowth is potentiated by stabilization of  
545 TrkA receptors. *BMB Rep.* 2011;44: 182-186.
- 546 15. Adams GP, Ratto MH, Huanca W, Singh J. Ovulation-inducing factor in the seminal plasma of  
547 alpacas and llamas. *Biol Reprod.* 2005;73: 452-457.
- 548 16. Silva M, Nino A, Guerra M, Letelier C, Valderrama XP, Adams GP, et al. Is an ovulation-inducing  
549 factor (OIF) present in the seminal plasma of rabbits? *Anim Reprod Sci.* 2011;127: 213-221.
- 550 17. Kershaw-Young CM, Druart X, Vaughan J, Maxwell WM. beta-Nerve growth factor is a major  
551 component of alpaca seminal plasma and induces ovulation in female alpacas. *Reprod Fertil Dev.*  
552 2012;24: 1093-1097.
- 553 18. Berland MA, Ulloa-Leal C, Barria M, Wright H, Dissen GA, Silva ME, Ojeda SR, Ratto MH.  
554 Seminal Plasma Induces Ovulation in Llamas in the Absence of a Copulatory Stimulus: Role of Nerve  
555 Growth Factor as an Ovulation-Inducing Factor. *Endocrinology* 2016;157: 3224-3232.
- 556 19. Harper GP, Thoenen H. The distribution of nerve growth factor in the male sex organs of  
557 mammals. *J Neurochem.* 1980;34: 893-903.
- 558 20. Sanchez-Rodriguez A, Arias-Alvarez M, Rebollar PG, Bautista JM, Lorenzo PL, Garcia-Garcia  
559 RM. Gene expression and immunolocalization of low-affinity neurotrophin receptor (p75) in rabbit  
560 male reproductive tract during sexual maturation *Reprod Domest Anim.* 2018;53(Suppl.2): 62-65.

- 561 21. Maranesi M, Parillo F, Leonardi L, Rebollar PG, Alonso B, Petrucci L, et al. Expression of nerve  
562 growth factor and its receptors in the uterus of rabbits: functional involvement in prostaglandin  
563 synthesis. *Domest Anim Endocrinol.* 2016;56: 20-28.
- 564 22. Maranesi M, Petrucci L, Leonardi L, Piro F, Rebollar PG, Millan P, et al. New insights on a NGF-  
565 mediated pathway to induce ovulation in rabbits (*Oryctolagus cuniculus*). *Biol Reprod.* 2018;98: 634-  
566 643.
- 567 23. Garcia-Garcia RM, Arias Alvarez M, Sanchez-Rodriguez A, Rebollar PG, Lorenzo PL. NGF  
568 system is differentially expressed in the ovary, oviduct and uterus of rabbit does although independent  
569 of serum hormonal levels. *Reprod Domest Anim.* 2018;53(Suppl.2): 88.
- 570 24. Casares-Crespo L, Fernandez-Serrano P, Vicente JS, Moce E, Castellini C, Stabile AM, et al.  
571 Insemination extender supplementation with bestatin and EDTA has no effect on rabbit reproductive  
572 performance. *Theriogenology* 2018;105: 61-65.
- 573 25. Masdeu MM, Garcia-Garcia RM, Millan P, Revuelta L, Sakr OG, Blanco PG, et al. Effect of  
574 Rabbit Seminal Plasma in ovulating response. *Reprod Fertil Dev.* 2012;25(1): 243.
- 575 26. Ratto MH, Leduc YA, Valderrama XP, van Straaten KE, Delbaere LT, Pierson RA, et al. The  
576 nerve of ovulation-inducing factor in semen. *Proc Natl Acad Sci U S A.* 2012;109: 15042-15047.
- 577 27. Ayer-LeLievre C, Olson L, Ebendal T, Hallbook F, Persson H. Nerve growth factor mRNA and  
578 protein in the testis and epididymis of mouse and rat. *Proc Natl Acad Sci U S A.* 1988;85: 2628-2632.
- 579 28. Chen Y, Dicou E, Djakiew D. Characterization of nerve growth factor precursor protein expression  
580 in rat round spermatids and the trophic effects of nerve growth factor in the maintenance of Sertoli cell  
581 viability. *Mol Cell Endocrinol.* 1997;127: 129-136.
- 582 29. Cupp AS, Kim GH, Skinner MK. Expression and action of neurotrophin-3 and nerve growth factor  
583 in embryonic and early postnatal rat testis development. *Biol Reprod.* 2000;63: 1617-1628.
- 584 30. Li C, Zhou X. The potential roles of neurotrophins in male reproduction. *Reproduction* 2013;145:  
585 R89-95.
- 586 31. Shi CG, Lin K, Xu XB, Zhang SC, Wang N, Fan M. Evidence for the involvement of  $\beta$ -NGF in  
587 human sperm motility. *J Biomed Sci Eng.* 2012;5: 534-541.

- 588 32. Saeednia S, Bahadoran H, Amidi F, Asadi MH, Najj M, Fallahi P, et al. Nerve growth factor in  
589 human semen: Effect of nerve growth factor on the normozoospermic men during cryopreservation  
590 process. *Iran J Basic Med Sci.* 2015;18: 292-299.
- 591 33. Li C, Sun Y, Yi K, Ma Y, Sun Y, Zhang W, Zhou X. Detection of nerve growth factor (NGF) and  
592 its specific receptor (TrkA) in ejaculated bovine sperm, and the effects of  $\beta$ -NGF on sperm function.  
593 *Theriogenology* 2010;74: 1615-1622.
- 594 34. Jin W, Tanaka A, Watanabe G, Matsuda H, Taya K. Effect of  $\beta$ -NGF on the motility and acrosome  
595 reaction of golden hamster spermatozoa in vitro. *J Reprod Dev.* 2010;56: 437-443.
- 596 35. Boletín Oficial del Estado Real Decreto 53/2013, por el que se establecen las normas básicas  
597 aplicables para la protección de los animales utilizados en experimentación y otros fines científicos,  
598 incluyendo la docencia. *BOE* 2013;34: 11370-11421.
- 599 36. Holtz W, Foote RH. The anatomy of the reproductive system in male Dutch rabbits (*Oryctolagus*  
600 *cuniculus*) with special emphasis on the accessory sex glands. *J Morphol.* 1978;158: 1-20.
- 601 37. Frohman MA, Dush MK, Martin GR. Rapid production of full-length cDNAs from rare  
602 transcripts: amplification using a single gene-specific oligonucleotide primer. *Proc Natl Acad Sci U S*  
603 *A.* 1988;85: 8998-9002.
- 604 38. Bradford MM. A rapid and sensitive method for the quantitation of microgram quantities of  
605 protein utilizing the principle of protein-dye binding. *Anal Biochem.* 1976;72: 248 – 254.
- 606 39. Haas AJ, Prigent S, Dutertre S, Le Drean Y, Le Page Y. Neurite analyzer: An original Fiji plugin  
607 for quantification of neuritogenesis in two-dimensional images. *J Neurosci Methods.* 2016;271: 86-91.
- 608 40. Joshi HC, Cleveland DW. Differential utilization of beta-tubulin isotypes in differentiating  
609 neurites. *J Cell Biol.* 1989;109(2): 663-73.
- 610 41. Casares-Crespo L, Talavan AM, Viudes-de-Castro MP. Can the Genetic Origin Affect Rabbit  
611 Seminal Plasma Protein Profile along the Year? *Reprod Domest Anim.* 2016;51: 294-300.
- 612 42. Sanchez-Rodriguez A, Arias-Alvarez M, Rebollar PG, Lorenzo PL; Garcia-Garcia RM.  
613 Immunolocalization of  $\beta$ -NGF in male reproductive tract and  $\beta$ -NGF levels in serum and seminal  
614 plasma at puberty and adulthood in rabbit. *Reprod Fertil Dev.* 2018;30: 214.



- 615 43. Gunning PW, Landreth GE, Layer P, Ignatius M, Shooter EM. Nerve growth factor-induced  
616 differentiation of PC12 cells: evaluation of changes in RNA and DNA metabolism. *J Neurosci.*  
617 1981;1: 368-379.
- 618 44. Katzir I, Shani J, Goshen G, Sela J, Ninary E, Dogonovski AM, et al. Characterization of nerve  
619 growth factors (NGFs) from snake venoms by use of a novel, quantitative bioassay utilizing  
620 pheochromocytoma (PC12) cells overexpressing human trkA receptors. *Toxicon* 2003;42: 481-490.
- 621 45. Fahnstock M, Yu G, Michalski B, Mathew S, Colquhoun A, Ross GM, et al. The nerve growth  
622 factor precursor proNGF exhibits neurotrophic activity but is less active than mature nerve growth  
623 factor. *J Neurochem.* 2004;89: 581-592.
- 624 46. Sanchez-Rodriguez A, Lorenzo PL, Arias-Alvarez M, Rebollar PG, Garcia-Garcia RM.  
625 Immunolocalization of Nerve Growth Factor high-affinity receptor (TrkA) in rabbit male tract. *Reprod*  
626 *Domest Anim.* 2017;52(Suppl. 4): 97-98.
- 627 47. Li C, Zheng L, Wang C, Zhou X. Absence of nerve growth factor and comparison of tyrosine  
628 kinase receptor A levels in mature spermatozoa from oligoasthenozoospermic, asthenozoospermic and  
629 fertile men. *Clin Chim Acta.* 2010;411: 1482-1486.
- 630 48. Lin K, Ding XF, Shi CG, Zeng D, QuZong S, Liu SH, et al. Nerve growth factor promotes human  
631 sperm motility in vitro by increasing the movement distance and the number of A grade spermatozoa.  
632 *Andrologia* 2015;47: 1041-1046.

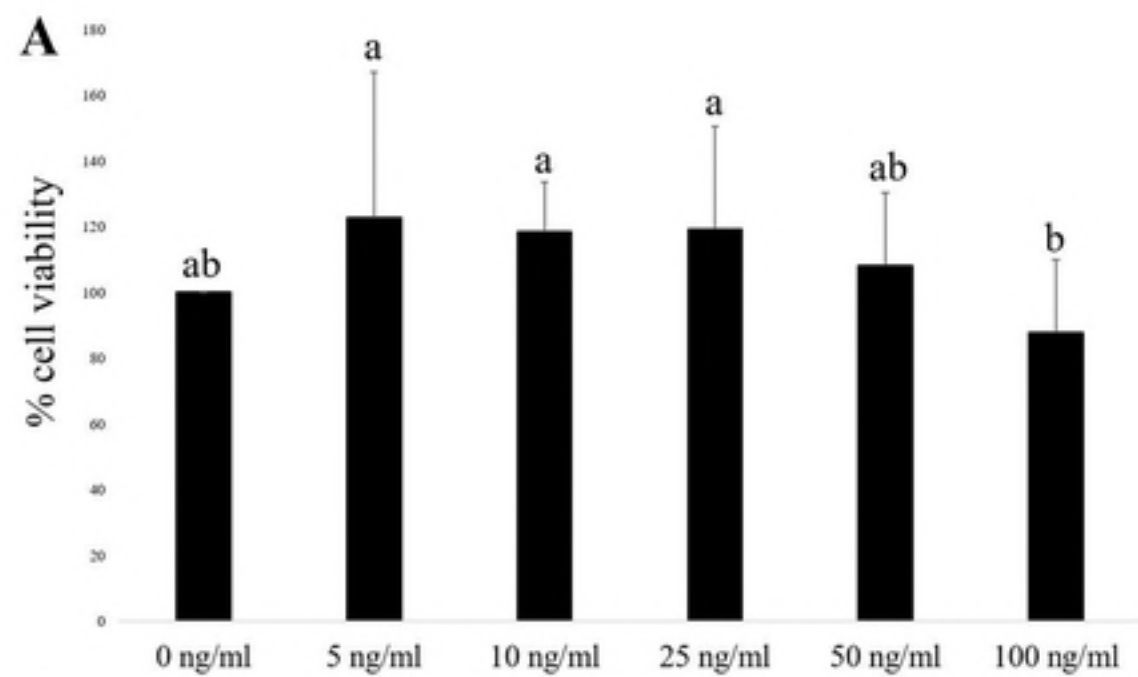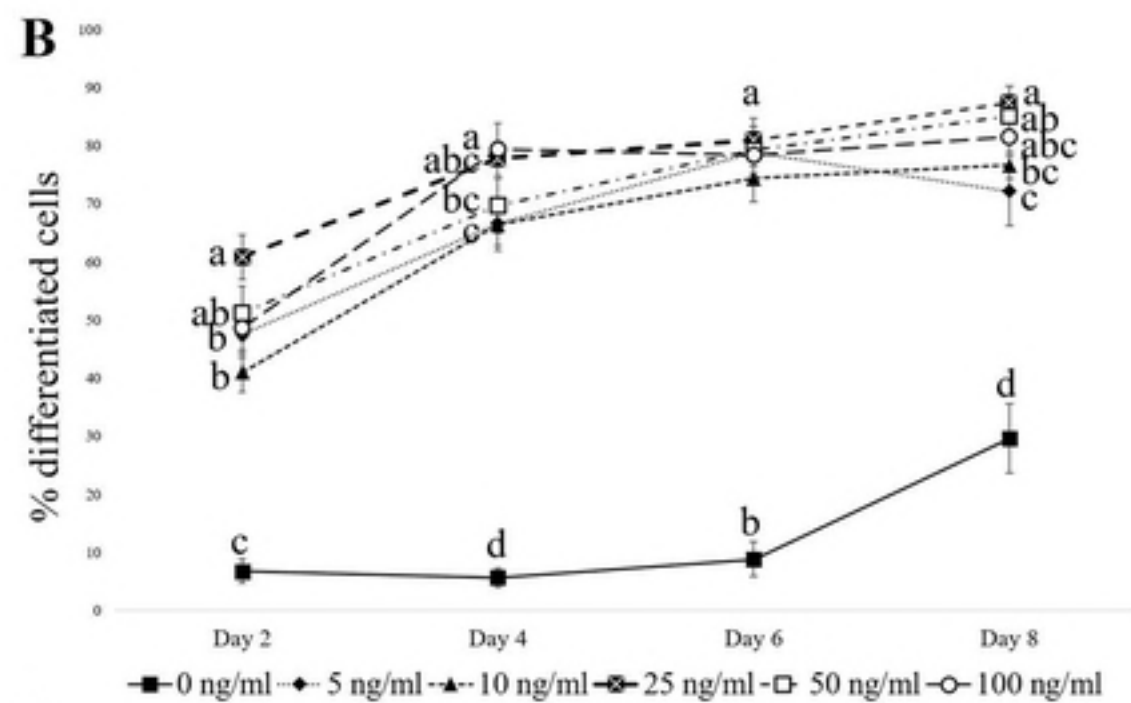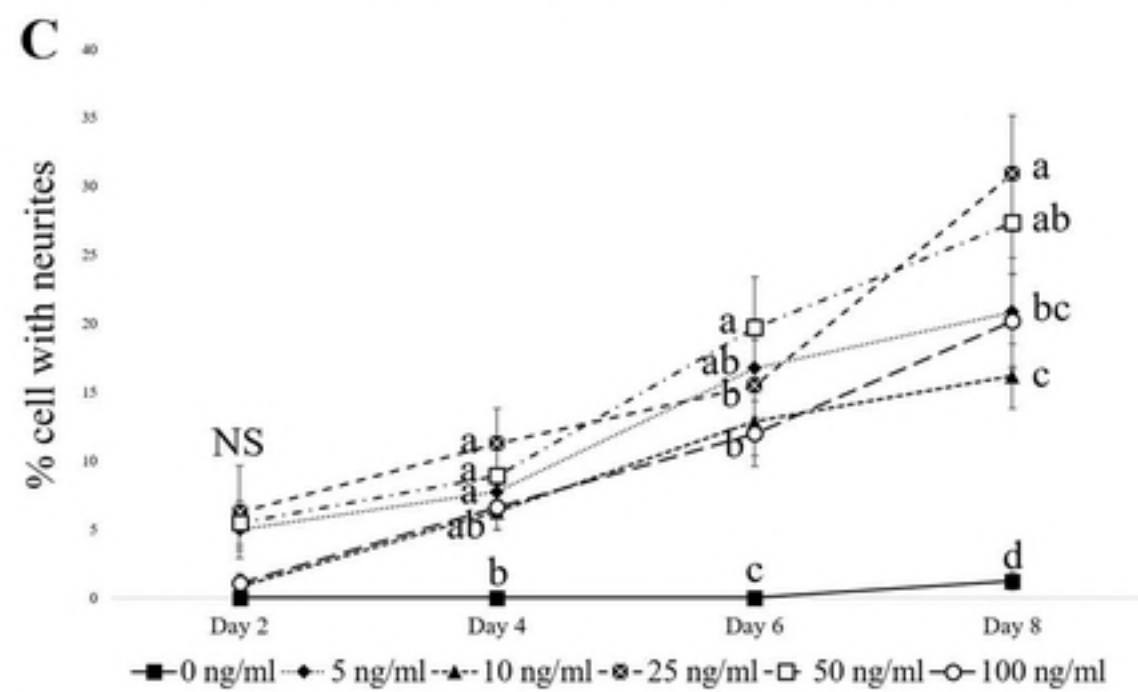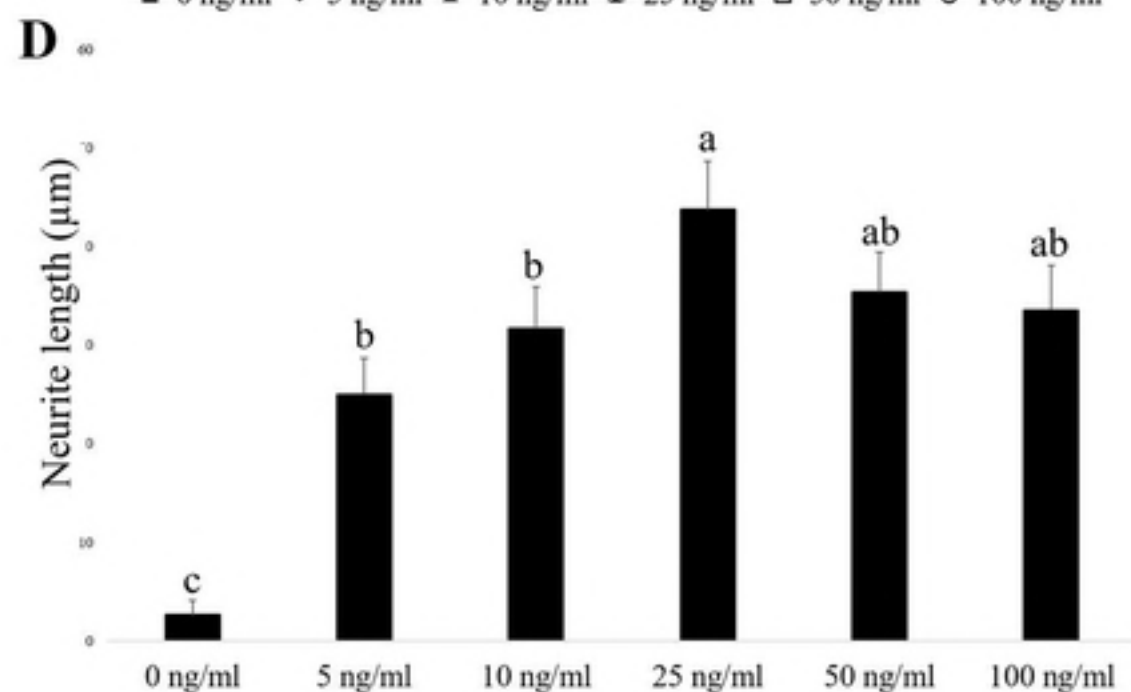

Figure 1

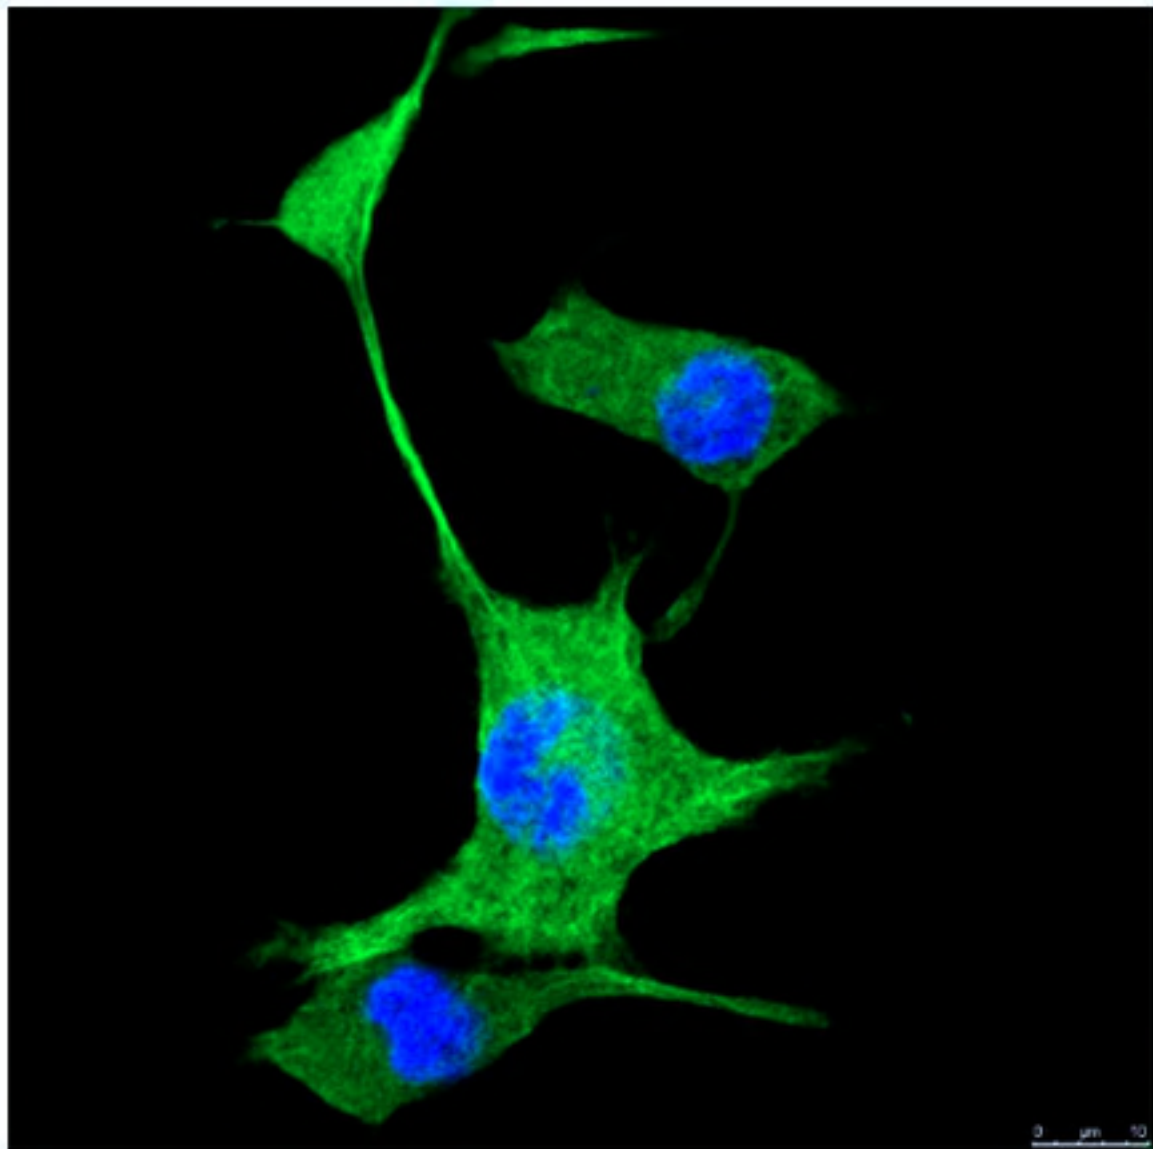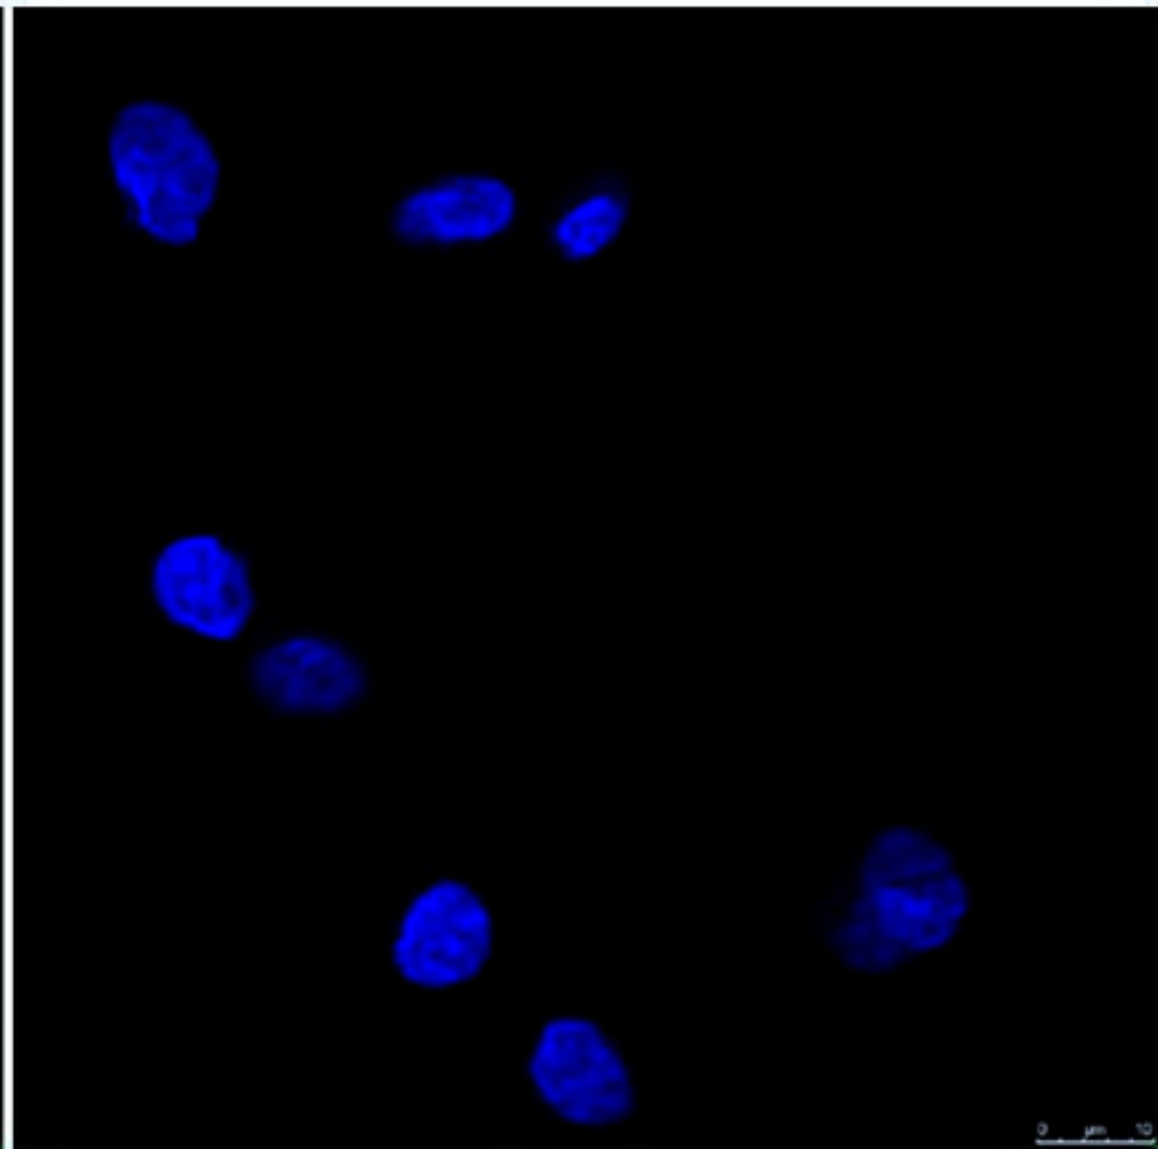

Figure 2

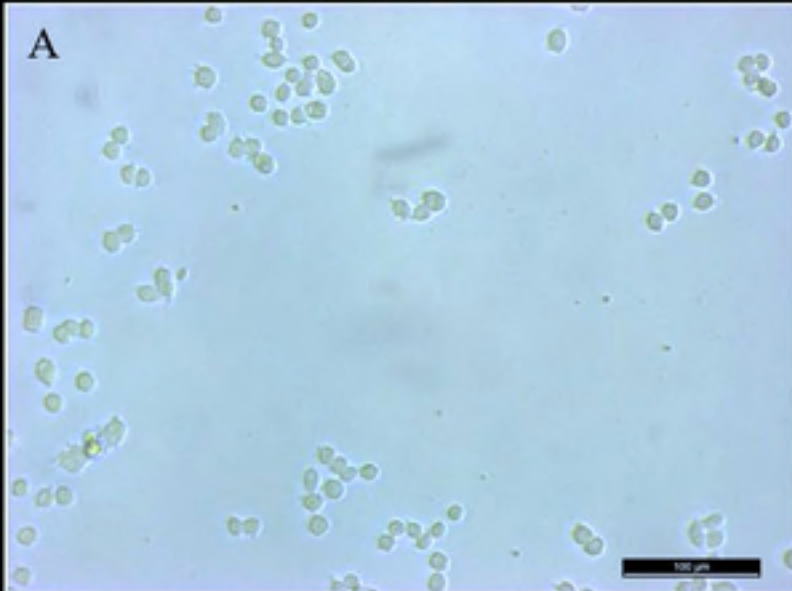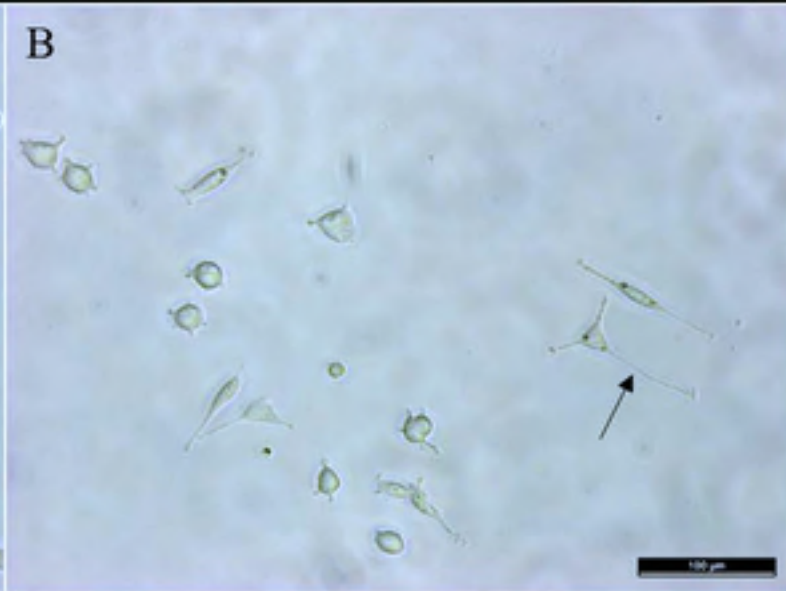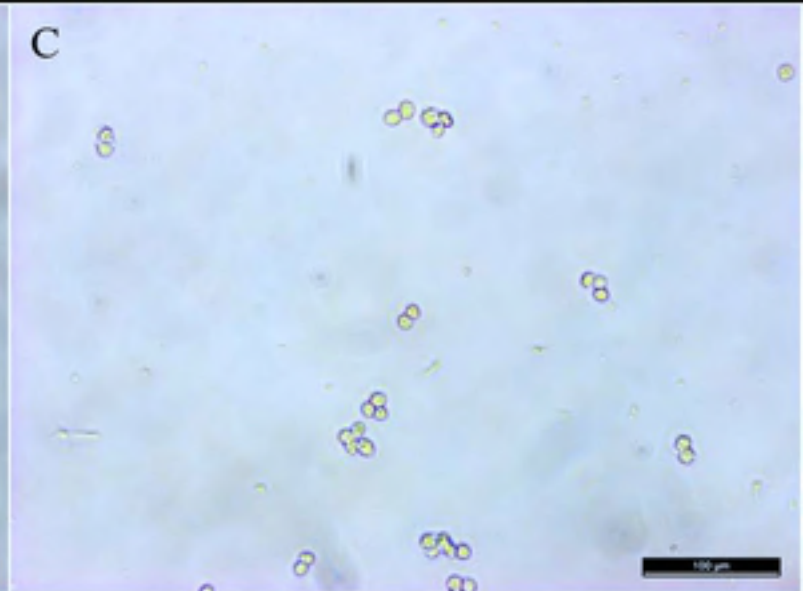

Figure 3



Signal peptide

|                         |                     |                           |                  |    |
|-------------------------|---------------------|---------------------------|------------------|----|
| NGF_KX528686            | MSMLFYTLITALLIGIQAE | EPHADSNVPAGHALPQAHWTKLQHS | LDLRRARAAPAVAIA  | 60 |
| IND_Llama_OIF_SP        | -----               | -----                     | -----            | 0  |
| IND_Camelus_dromedarius | MSMLFYTLITALLIGIQAE | EPHTKSNVPAGHDVPQAHWTKLQHS | LDLRRRAHSAPAGAIA | 60 |
| IND_Vicugna_pacos       | MSMLFYTLITALLIGIQAE | EPHTKSNVPAGHDVPQAHWTKLQHS | LDLRRRAHSAPAGAIA | 60 |
| IND_Camelus_ferus       | MSMLFYTLITALLIGIQAE | EPHTKSNVPAGHDVPQAHWTKLQHS | LDLRRRAHSAPAGAIA | 60 |
| IND_Camelus_bactrianus  | MSMLFYTLITALLIGIQAE | EPHTKSNVPAGHDVPQAHWTKLQHS | LDLRRRAHSAPAGAIA | 60 |
| SPONT_Rattus_norvegicus | MSMLFYTLITAFBIGVQAE | EPYTDNSVPEGDSVPEAHWTKLQHS | LDLRRARSAPAEPIA  | 60 |
| SPONT_Mus_musculus      | MSMLFYTLITAFBIGVQAE | EPYTDNSVPEGDSVPEAHWTKLQHS | LDLRRARSAPTAPIA  | 60 |
| SPONT_Bos_taurus        | MSMLFYTLITALLIGIQAE | APHTESNVPAGHAIPQAHWIKLQHS | LDLRRRAHSAPAGPIA | 60 |
| SPONT_Homo_sapiens      | MSMLFYTLITAFBIGVQAE | EPHSESNVPAGHTIPQAHWTKLQHS | LDLRRARSAPAAAIA  | 60 |

|                         |           |                  |                 |              |       |       |       |     |
|-------------------------|-----------|------------------|-----------------|--------------|-------|-------|-------|-----|
| NGF_KX528686            | ARVAGQTRN | ITVDPRLFKKRRRLRS | PRVLFSTQPPLAAVD | FEELDLEVDV   | GSPSN | NR    | TYRSK | 120 |
| IND_Llama_OIF_SP        | -----     | -----            | -----           | -----        | ----- | ----- | ----- | 0   |
| IND_Camelus_dromedarius | ARVAGQTRN | ITVDPKLFKKRRRLRS | PRVLFSTQPPPVAAD | TQDLLEANRAAS | FN    | NR    | THRSK | 120 |
| IND_Vicugna_pacos       | ARVAGQTRN | ITVDPKLFKKRRRLRS | PRVLFSTQPPPVAAD | TQDLLEANRAAS | FN    | NR    | THRSK | 120 |
| IND_Camelus_ferus       | ARVAGQTRN | ITVDPKLFKKRRRLRS | PRVLFSTQPPPVAAD | TQDLLEANRAAS | FN    | NR    | THRSK | 120 |
| IND_Camelus_bactrianus  | ARVAGQTRN | ITVDPKLFKKRRRLRS | PRVLFSTQPPPVAAD | TQDLLEANRAAS | FN    | NR    | THRSK | 120 |
| SPONT_Rattus_norvegicus | ARVTGQTRN | ITVDPKLFKKRRRLRS | PRVLFSTQPPPTSS  | DTLDFQAHGTIS | FN    | NR    | THRSK | 120 |
| SPONT_Mus_musculus      | ARVTGQTRN | ITVDPRLFKKRRRLH  | SPRVLFSTQPPPTSS | DTLDFQAHGTIP | FN    | NR    | THRSK | 120 |
| SPONT_Bos_taurus        | ARVAGQTHN | ITVDPKLFKKRRRLRS | PRVLFSTQPPPVAAD | TQDLFEAGGASS | FN    | NR    | THRSK | 120 |
| SPONT_Homo_sapiens      | ARVAGQTRN | ITVDPRLFKKRRRLRS | PRVLFSTQPPREAD  | TQDLFEVGGAAP | FN    | NR    | THRSK | 120 |

|                         |              |        |    |      |    |          |   |    |     |     |    |     |    |      |   |    |    |    |    |    |     |    |     |
|-------------------------|--------------|--------|----|------|----|----------|---|----|-----|-----|----|-----|----|------|---|----|----|----|----|----|-----|----|-----|
| NGF_KX528686            | RSAP-HPVFHMG | EFVSV  | CD | SVSV | WV | GDKTTATD | I | KG | NEV | KVL | GE | VNI | N  | NS   | V | FK | QY | FF | ET | KC | 179 |    |     |
| IND_Llama_OIF_SP        | --APSHPIFHR  | GEFVSV | CD | SVSV | WV | ADKTTATD | I | KG | KE  | V   | M  | V   | GE | VNI  | N | NS | V  | FK | QY | FF | ET  | KC | 58  |
| IND_Camelus_dromedarius | RSAPSHPIFHR  | GEFVSV | CD | SVSV | WV | ADKTTATD | I | KG | KE  | V   | M  | V   | GE | VNI  | N | NS | V  | FK | QY | FF | ET  | KC | 180 |
| IND_Vicugna_pacos       | RSAPSHPIFHR  | GEFVSV | CD | SVSV | WV | ADKTTATD | I | KG | KE  | V   | M  | V   | GE | VNI  | N | NS | V  | FK | QY | FF | ET  | KC | 180 |
| IND_Camelus_ferus       | RSAPSHPIFHR  | GEFVSV | CD | SVSV | WV | ADKTTATD | I | KG | KE  | V   | M  | V   | GE | VNI  | N | NS | V  | FK | QY | FF | ET  | KC | 180 |
| IND_Camelus_bactrianus  | RSAPSHPIFHR  | GEFVSV | CD | SVSV | WV | ADKTTATD | I | KG | KE  | V   | M  | V   | GE | VNI  | N | NS | V  | FK | QY | FF | ET  | KC | 180 |
| SPONT_Rattus_norvegicus | RSS-THPVFHM  | GEFVSV | CD | SVSV | WV | GDKTTATD | I | KG | KE  | V   | T  | V   | GE | VNI  | N | NS | V  | FK | QY | FF | ET  | KC | 179 |
| SPONT_Mus_musculus      | RSS-THPVFHM  | GEFVSV | CD | SVSV | WV | GDKTTATD | I | KG | KE  | V   | T  | V   | LA | EVNI | N | NS | V  | FR | QY | FF | ET  | KC | 179 |
| SPONT_Bos_taurus        | RSS-SHPVFHR  | GEFVSV | CD | SISV | WV | GDKTTATD | I | KG | KE  | V   | M  | V   | GE | VNI  | N | NS | V  | FK | QY | FF | ET  | KC | 179 |
| SPONT_Homo_sapiens      | RSS-SHPVFHR  | GEFVSV | CD | SVSV | WV | GDKTTATD | I | KG | KE  | V   | M  | V   | GE | VNI  | N | NS | V  | FK | QY | FF | ET  | KC | 179 |

|                         |        |     |    |     |    |       |    |      |    |     |     |    |    |    |    |    |     |     |   |   |   |   |   |   |   |   |   |     |     |
|-------------------------|--------|-----|----|-----|----|-------|----|------|----|-----|-----|----|----|----|----|----|-----|-----|---|---|---|---|---|---|---|---|---|-----|-----|
| NGF_KX528686            | RDPNPV | ESG | CR | GID | AK | HWNSY | CT | TTHT | FV | KAL | TDD | KQ | AA | RF | IR | ID | TAC | V   | C | V | L | S | R | K | A | S | R | 239 |     |
| IND_Llama_OIF_SP        | RDPNPV | ASG | CR | GID | SK | HWNSY | CT | TTHT | FV | KAL | TMD | GK | QA | AW | RF | IR | ID  | TAC | V | C | V | L | S | K | K | A | S | 117 |     |
| IND_Camelus_dromedarius | RDPNP  | DES | CR | GID | SK | HWNSY | CT | TTHT | FV | RAL | TMD | GK | QA | AW | RF | IR | ID  | TAC | V | C | V | L | S | R | K | A | G | R   | 240 |
| IND_Vicugna_pacos       | RDPNP  | DES | CR | GID | SK | HWNSY | CT | TTHT | FV | RAL | TMD | GK | QA | AW | RF | IR | ID  | TAC | V | C | V | L | S | R | K | A | G | R   | 240 |
| IND_Camelus_ferus       | RDPNP  | DES | CR | GID | SK | HWNSY | CT | TTHT | FV | RAL | TMD | GK | QA | AW | RF | IR | ID  | TAC | V | C | V | L | S | R | K | A | G | R   | 240 |
| IND_Camelus_bactrianus  | RDPNP  | DES | CR | GID | SK | HWNSY | CT | TTHT | FV | RAL | TMD | GK | QA | AW | RF | IR | ID  | TAC | V | C | V | P | P | C | N | F | R | E   | 240 |
| SPONT_Rattus_norvegicus | RAPNP  | VES | CR | GID | SK | HWNSY | CT | TTHT | FV | KAL | TDD | KQ | AA | RF | IR | ID | TAC | V   | C | V | L | S | R | K | A | A | R | 239 |     |
| SPONT_Mus_musculus      | RASNP  | VES | CR | GID | SK | HWNSY | CT | TTHT | FV | KAL | TDE | KQ | AA | RF | IR | ID | TAC | V   | C | V | L | S | R | K | A | T | R | 239 |     |
| SPONT_Bos_taurus        | RDPNP  | VDS | CR | GID | AK | HWNSY | CT | TTHT | FV | KAL | TMD | GK | QA | AW | RF | IR | ID  | TAC | V | C | V | L | S | R | K | T | G | Q   | 239 |
| SPONT_Homo_sapiens      | RDPNP  | VDS | CR | GID | SK | HWNSY | CT | TTHT | FV | KAL | TMD | GK | QA | AW | RF | IR | ID  | TAC | V | C | V | L | S | R | K | A | V | R   | 239 |

|                         |    |     |
|-------------------------|----|-----|
| NGF_KX528686            | RG | 241 |
| IND_Llama_OIF_SP        | -- | 117 |
| IND_Camelus_dromedarius | RA | 242 |
| IND_Vicugna_pacos       | RA | 242 |
| IND_Camelus_ferus       | RA | 242 |
| IND_Camelus_bactrianus  | G- | 241 |
| SPONT_Rattus_norvegicus | RG | 241 |
| SPONT_Mus_musculus      | RG | 241 |
| SPONT_Bos_taurus        | RA | 241 |
| SPONT_Homo_sapiens      | RA | 241 |

Figure 4



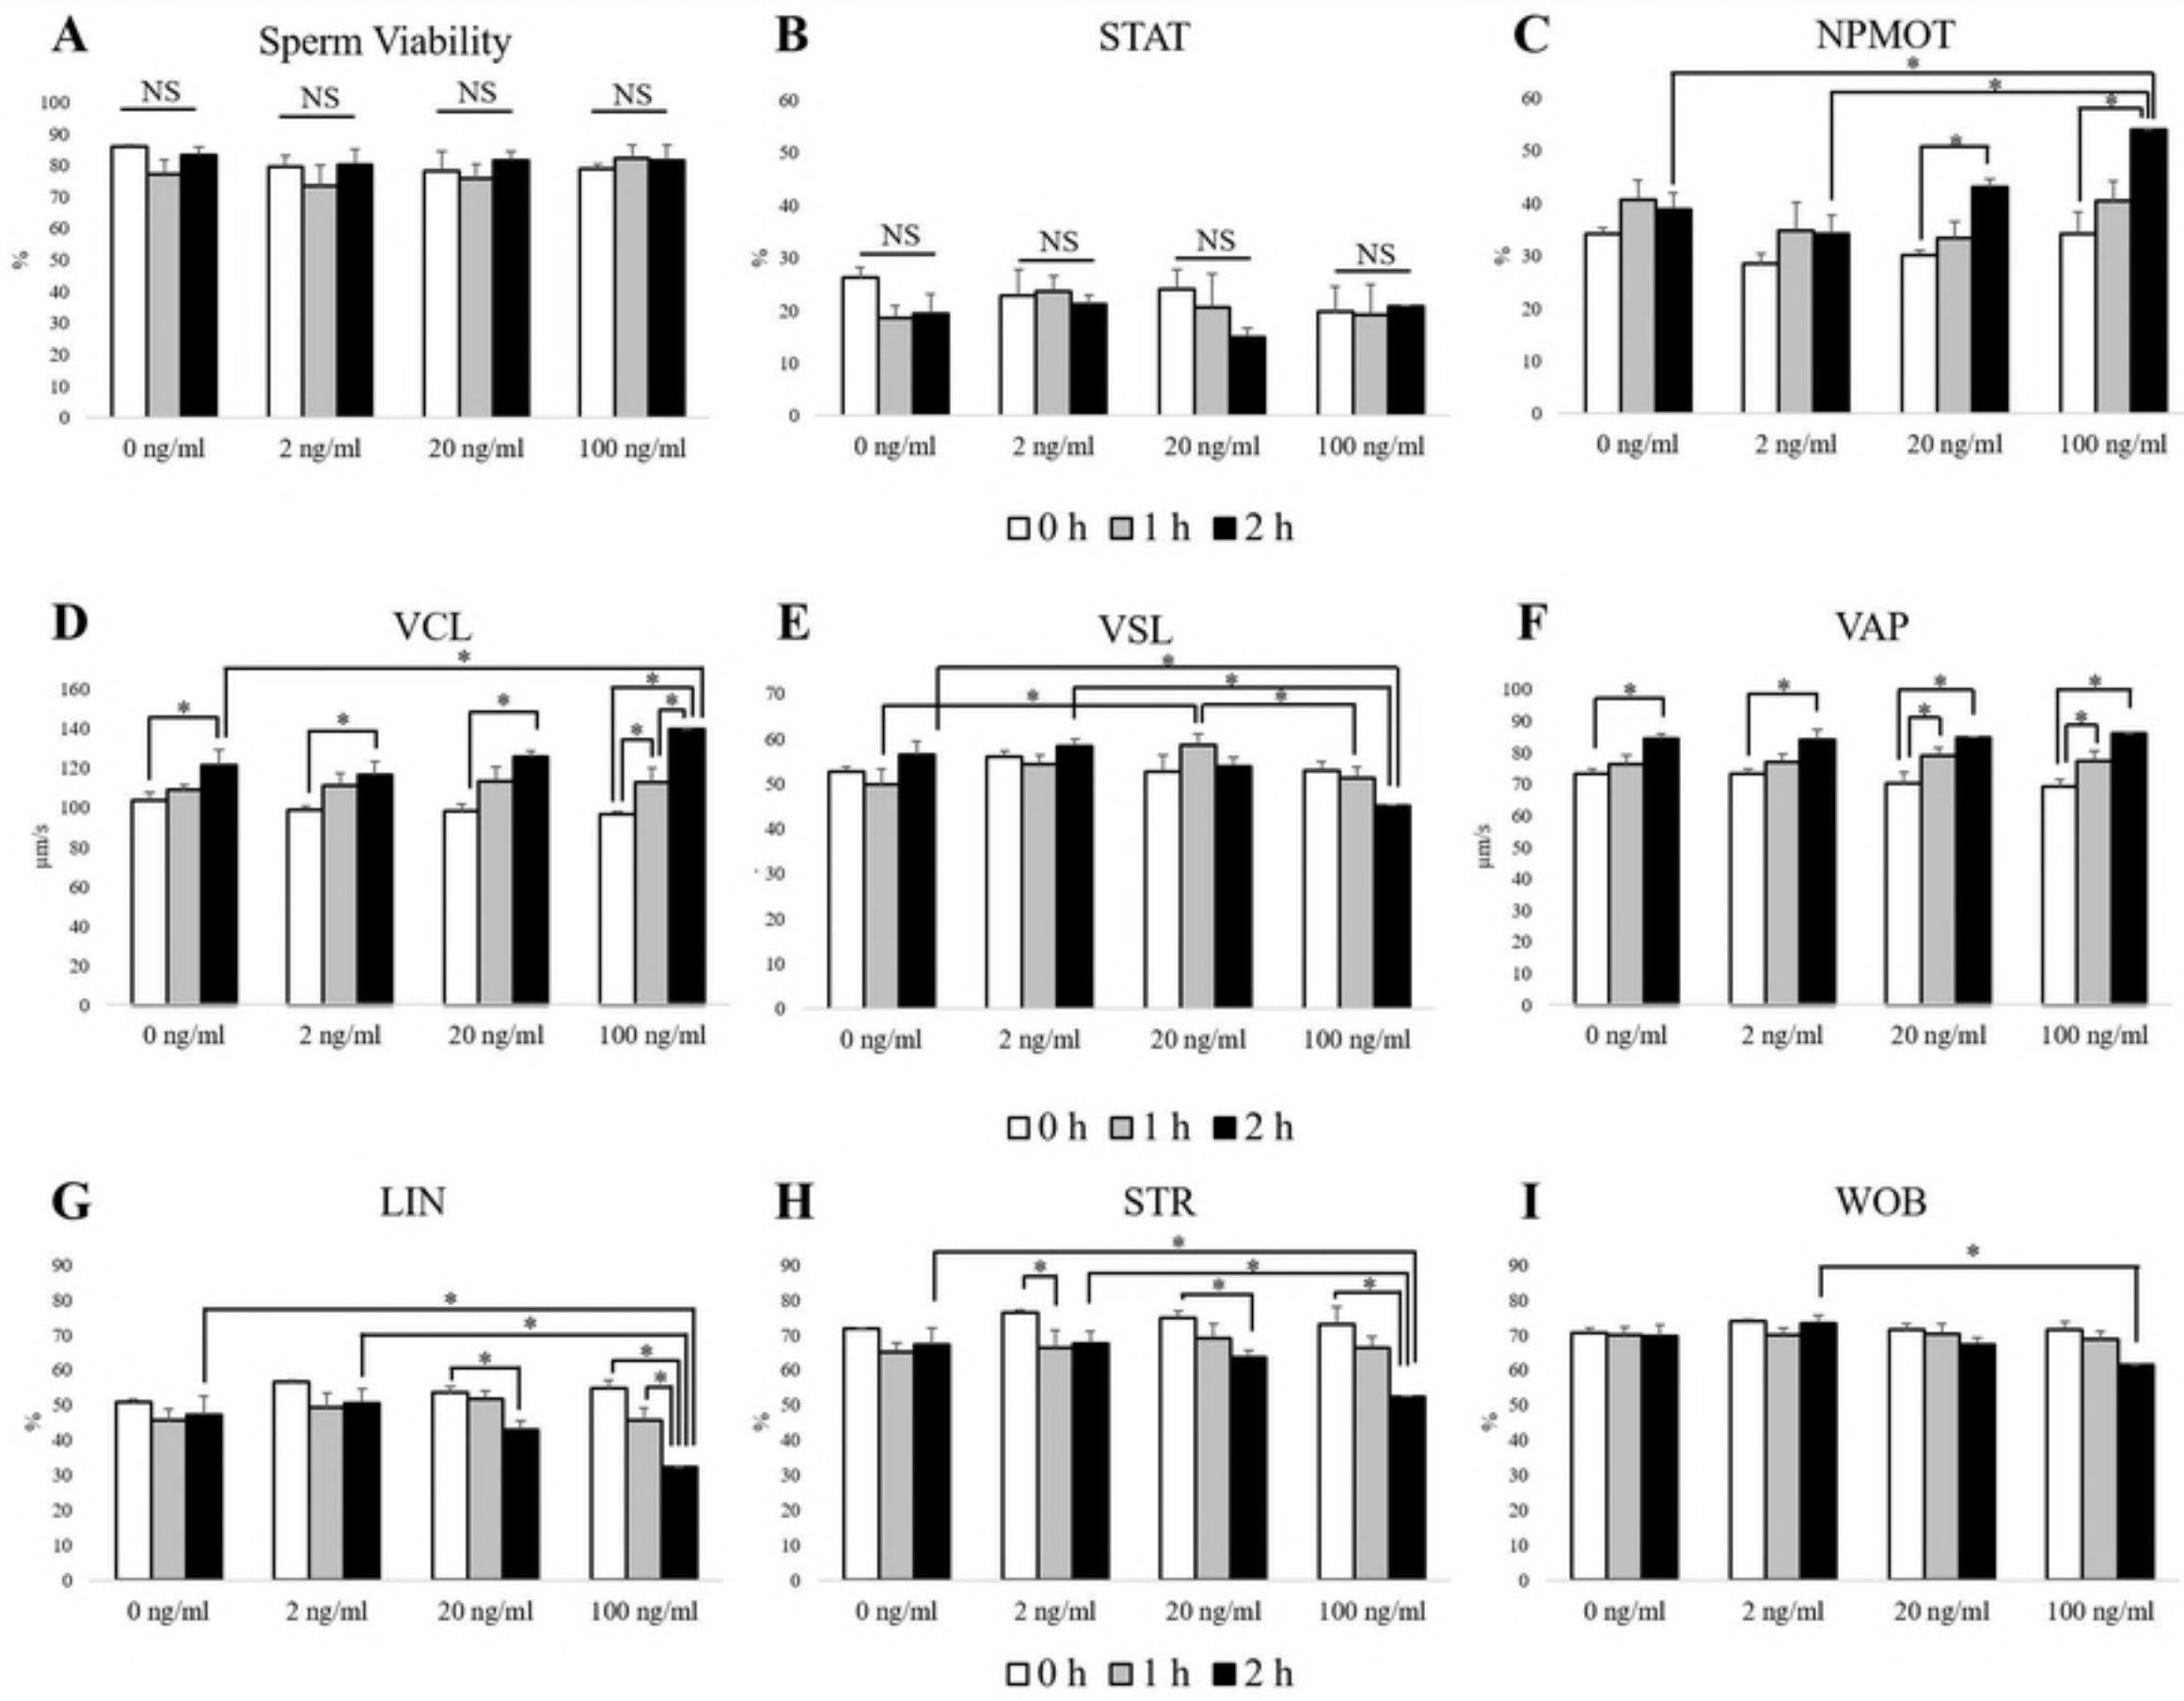

Figure 5
